# Supplementary material
Source: bioRxiv or medRxiv preprint supplement (https://www.biorxiv.org/highwire/filestream/12832/field_highwire_adjunct_files/0/017269-1.pdf)
Supplement: Supplementary file [file 017269-1.pdf]

# Supplementary Information A. Thermometer Sequences

Naming convention

U2<basepair#><identity of base pair = A, G, U, C or 0>

| S. No. | Name | Sequence                                                                                                  |
|--------|------|-----------------------------------------------------------------------------------------------------------|
| 0      | U2   | <u>GGAUCCCUCA</u> <u>CUUACUAGUC</u> <u>UGCAG<u>A</u>AAGGA</u> <u>GAU<u>AU</u>ACCCA</u> <u>UGG</u>         |
| 1      | U210 | <u>GAUCCCUCA</u> <u>CUUACUAGUC</u> <u>UGCAG<u>A</u>AAGGA</u> <u>GAU<u>AU</u>ACCCA</u> <u>UGG</u>          |
| 2      | U21A | <u><u>A</u>GAUCCCUCA</u> <u>CUUACUAGUC</u> <u>UGCAG<u>A</u>AAGGA</u> <u>GAU<u>AU</u>ACCCA</u> <u>UGG</u>  |
| 3      | U21C | <u><u>C</u>GAUCCCUCA</u> <u>CUUACUAGUC</u> <u>UGCAG<u>A</u>AAGGA</u> <u>GAU<u>AU</u>ACCCA</u> <u>UGG</u>  |
| 4      | U21U | <u><u>U</u>GAUCCCUCA</u> <u>CUUACUAGUC</u> <u>UGCAG<u>A</u>AAGGA</u> <u>GAU<u>AU</u>ACCCA</u> <u>UGG</u>  |
| 5      | U220 | <u>G</u> <u>AUCCCUCA</u> <u>CUUACUAGUC</u> <u>UGCAG<u>A</u>AAGGA</u> <u>GAU<u>AU</u>ACCCA</u> <u>UGG</u>  |
| 6      | U22A | <u><u>G</u>AUCCCUCA</u> <u>CUUACUAGUC</u> <u>UGCAG<u>A</u>AAGGA</u> <u>GAU<u>AU</u>ACCCA</u> <u>UGG</u>   |
| 7      | U22C | <u><u>G</u>C</u> AUCCCUCA <u>CUUACUAGUC</u> <u>UGCAG<u>A</u>AAGGA</u> <u>GAU<u>AU</u>ACCCA</u> <u>UGG</u> |
| 8      | U22U | <u><u>G</u>U</u> AUCCCUCA <u>CUUACUAGUC</u> <u>UGCAG<u>A</u>AAGGA</u> <u>GAU<u>AU</u>ACCCA</u> <u>UGG</u> |
| 9      | U230 | <u>GG</u> <u>UCCCUCA</u> <u>CUUACUAGUC</u> <u>UGCAG<u>A</u>AAGGA</u> <u>GAU<u>AU</u>ACCCA</u> <u>UGG</u>  |
| 10     | U23C | <u>GG<u>C</u></u> UCCCUCA <u>CUUACUAGUC</u> <u>UGCAG<u>A</u>AAGGA</u> <u>GAU<u>AU</u>ACCCA</u> <u>UGG</u> |
| 11     | U23G | <u>GG<u>G</u></u> UCCCUCA <u>CUUACUAGUC</u> <u>UGCAG<u>A</u>AAGGA</u> <u>GAU<u>AU</u>ACCCA</u> <u>UGG</u> |
| 12     | U23U | <u>GG<u>U</u></u> UCCCUCA <u>CUUACUAGUC</u> <u>UGCAG<u>A</u>AAGGA</u> <u>GAU<u>AU</u>ACCCA</u> <u>UGG</u> |
| 13     | U240 | <u>GGA</u> <u>CCCUCA</u> <u>CUUACUAGUC</u> <u>UGCAG<u>A</u>AAGGA</u> <u>GAU<u>AU</u>ACCCA</u> <u>UGG</u>  |
| 14     | U24A | <u>GGA<u>A</u></u> CCCUCA <u>CUUACUAGUC</u> <u>UGCAG<u>A</u>AAGGA</u> <u>GAU<u>AU</u>ACCCA</u> <u>UGG</u> |
| 15     | U24C | <u>GGA<u>C</u></u> CCCUCA <u>CUUACUAGUC</u> <u>UGCAG<u>A</u>AAGGA</u> <u>GAU<u>AU</u>ACCCA</u> <u>UGG</u> |
| 16     | U24G | <u>GGA<u>G</u></u> CCCUCA <u>CUUACUAGUC</u> <u>UGCAG<u>A</u>AAGGA</u> <u>GAU<u>AU</u>ACCCA</u> <u>UGG</u> |

| S. No. | Name  | Sequence                                         |
|--------|-------|--------------------------------------------------|
| 0      | U2    | GGAUCCCUCA CUUACUAGUC UGCAGAAGGA GAUAUACCCA UGG  |
| 17     | U270  | GGAUCC UCA CUUACUAGUC UGCAGAAGGA GAUAUACCCA UGG  |
| 18     | U27A  | GGAUCCAUCA CUUACUAGUC UGCAGAAGGA GAUAUACCCA UGG  |
| 19     | U27G  | GGAUCCGUCA CUUACUAGUC UGCAGAAGGA GAUAUACCCA UGG  |
| 20     | U27U  | GGAUCCUUCA CUUACUAGUC UGCAGAAGGA GAUAUACCCA UGG  |
| 21     | U280  | GGAUCCC CA CUUACUAGUC UGCAGAAGGA GAUAUACCCA UGG  |
| 22     | U28A  | GGAUCCCACA CUUACUAGUC UGCAGAAGGA GAUAUACCCA UGG  |
| 23     | U28C  | GGAUCCCCCA CUUACUAGUC UGCAGAAGGA GAUAUACCCA UGG  |
| 24     | U28G  | GGAUCCC GCA CUUACUAGUC UGCAGAAGGA GAUAUACCCA UGG |
| 25     | U290  | GGAUCCC U A CUUACUAGUC UGCAGAAGGA GAUAUACCCA UGG |
| 26     | U29A  | GGAUCCC UAA CUUACUAGUC UGCAGAAGGA GAUAUACCCA UGG |
| 27     | U29G  | GGAUCCC UGA CUUACUAGUC UGCAGAAGGA GAUAUACCCA UGG |
| 28     | U29U  | GGAUCCC UUA CUUACUAGUC UGCAGAAGGA GAUAUACCCA UGG |
| 29     | U2110 | GGAUCCC UCA UUACUAGUC UGCAGAAGGA GAUAUACCCA UGG  |
| 30     | U211A | GGAUCCC UCA AUUACUAGUC UGCAGAAGGA GAUAUACCCA UGG |
| 31     | U211G | GGAUCCC UCA GUUACUAGUC UGCAGAAGGA GAUAUACCCA UGG |
| 32     | U211U | GGAUCCC UCA UUUACUAGUC UGCAGAAGGA GAUAUACCCA UGG |

| S. No. | Name  | Sequence                                         |
|--------|-------|--------------------------------------------------|
| 0      | U2    | GGAUCCCUCA CUUACUAGUC UGCAGAAGGA GAUAUACCCA UGG  |
| 33     | U2120 | GGAUCCCUCA C UACUAGUC UGCAGAAGGA GAUAUACCCA UGG  |
| 34     | U212A | GGAUCCCUCA CAUACUAGUC UGCAGAAGGA GAUAUACCCA UGG  |
| 35     | U212C | GGAUCCCUCA CCUACUAGUC UGCAGAAGGA GAUAUACCCA UGG  |
| 36     | U212G | GGAUCCCUCA CGUACUAGUC UGCAGAAGGA GAUAUACCCA UGG  |
| 37     | U2130 | GGAUCCCUCA CU ACUAGUC UGCAGAAGGA GAUAUACCCA UGG  |
| 38     | U213A | GGAUCCCUCA CUAACUAGUC UGCAGAAGGA GAUAUACCCA UGG  |
| 39     | U213C | GGAUCCCUCA CUCACUAGUC UGCAGAAGGA GAUAUACCCA UGG  |
| 40     | U213G | GGAUCCCUCA CUGACUAGUC UGCAGAAGGA GAUAUACCCA UGG  |
| 41     | U2150 | GGAUCCCUCA CUUA UAGUC UGCAGAAGGA GAUAUACCCA UGG  |
| 42     | U215A | GGAUCCCUCA CUUA AUAGUC UGCAGAAGGA GAUAUACCCA UGG |
| 43     | U215G | GGAUCCCUCA CUUAGUAGUC UGCAGAAGGA GAUAUACCCA UGG  |
| 44     | U215U | GGAUCCCUCA CUUAUAGUC UGCAGAAGGA GAUAUACCCA UGG   |
| 45     | U2160 | GGAUCCCUCA CUUAC AGUC UGCAGAAGGA GAUAUACCCA UGG  |
| 46     | U216A | GGAUCCCUCA CUUACAAGUC UGCAGAAGGA GAUAUACCCA UGG  |
| 47     | U216C | GGAUCCCUCA CUUACAGUC UGCAGAAGGA GAUAUACCCA UGG   |
| 48     | U216G | GGAUCCCUCA CUUACGAGUC UGCAGAAGGA GAUAUACCCA UGG  |

| S. No. | Name  | Sequence                                                           |
|--------|-------|--------------------------------------------------------------------|
| 0      | U2    | GGAUCCCUCA CUUACUAGUC UGC <u>A</u> AAGGA GAU <u>A</u> ACCCA UGG    |
| 49     | U2240 | GGAUCCCUCA CUUACUAGUC UGC GAAGGA GAU <u>A</u> ACCCA UGG            |
| 50     | U224C | GGAUCCCUCA CUUACUAGUC UGC <u>C</u> AAGGA GAU <u>A</u> ACCCA UGG    |
| 51     | U224G | GGAUCCCUCA CUUACUAGUC UGC <u>G</u> AAGGA GAU <u>A</u> ACCCA UGG    |
| 52     | U224U | GGAUCCCUCA CUUACUAGUC UGC <u>U</u> AAGGA GAU <u>A</u> ACCCA UGG    |
| 53     | U2250 | GGAUCCCUCA CUUACUAGUC UGCA AAGGA GAU <u>A</u> ACCCA UGG            |
| 54     | U225A | GGAUCCCUCA CUUACUAGUC UGCA <u>A</u> AAGGA GAU <u>A</u> ACCCA UGG   |
| 55     | U225C | GGAUCCCUCA CUUACUAGUC UGCA <u>C</u> AAGGA GAU <u>A</u> ACCCA UGG   |
| 56     | U225U | GGAUCCCUCA CUUACUAGUC UGCA <u>U</u> AAGGA GAU <u>A</u> ACCCA UGG   |
| 57     | U2340 | GGAUCCCUCA CUUACUAGUC UGCAG <u>A</u> AAGGA GAU UACCCA UGG          |
| 58     | U234C | GGAUCCCUCA CUUACUAGUC UGCAG <u>A</u> AAGGA GAU <u>C</u> UACCCA UGG |
| 59     | U234G | GGAUCCCUCA CUUACUAGUC UGCAG <u>A</u> AAGGA GAU <u>G</u> UACCCA UGG |
| 60     | U234U | GGAUCCCUCA CUUACUAGUC UGCAG <u>A</u> AAGGA GAU <u>U</u> UACCCA UGG |
| 61     | U2350 | GGAUCCCUCA CUUACUAGUC UGCAG <u>A</u> AAGGA GAUA ACCCA UGG          |
| 62     | U235A | GGAUCCCUCA CUUACUAGUC UGCAG <u>A</u> AAGGA GAUA <u>A</u> ACCCA UGG |
| 63     | U235C | GGAUCCCUCA CUUACUAGUC UGCAG <u>A</u> AAGGA GAUA <u>C</u> ACCCA UGG |
| 64     | U235G | GGAUCCCUCA CUUACUAGUC UGCAG <u>A</u> AAGGA GAUA <u>G</u> ACCCA UGG |

| S. No. | Name  | Sequence                                          |
|--------|-------|---------------------------------------------------|
| 0      | U2    | GGAUCCCUCA CUUACUAGUC UGCAGAAGGA GAUAUACCCA UGG   |
| 65     | U2370 | GGAUCCCUCA CUUACUAGUC UGCAGAAGGA GAUAUA CCA UGG   |
| 66     | U237A | GGAUCCCUCA CUUACUAGUC UGCAGAAGGA GAUAUAACCA UGG   |
| 67     | U237G | GGAUCCCUCA CUUACUAGUC UGCAGAAGGA GAUAUAGCCA UGG   |
| 68     | U237U | GGAUCCCUCA CUUACUAGUC UGCAGAAGGA GAUAUAUCCA UGG   |
| 69     | U2380 | GGAUCCCUCA CUUACUAGUC UGCAGAAGGA GAUAUAC CA UGG   |
| 70     | U238A | GGAUCCCUCA CUUACUAGUC UGCAGAAGGA GAUAUACACA UGG   |
| 71     | U238G | GGAUCCCUCA CUUACUAGUC UGCAGAAGGA GAUAUACGCA UGG   |
| 72     | U238U | GGAUCCCUCA CUUACUAGUC UGCAGAAGGA GAUAUACUCA UGG   |
| 73     | U2100 | GGAUCCCUCC CUUACUAGUC UGCAGAAGGA GAUAUACCCA UGG   |
| 74     | U210C | GGAUCCCUCC C CUUACUAGUC UGCAGAAGGA GAUAUACCCA UGG |
| 75     | U210G | GGAUCCCUCC G CUUACUAGUC UGCAGAAGGA GAUAUACCCA UGG |
| 76     | U210U | GGAUCCCUCC U CUUACUAGUC UGCAGAAGGA GAUAUACCCA UGG |

# Supplementary Information B. Primer Sequences

|      |                                               |        |                                                                       |
|------|-----------------------------------------------|--------|-----------------------------------------------------------------------|
| U210 | <u>GAUCCCUACACUU ACUAGUCUGCAG AAGGAGAU</u>    | U210_F | GACGTGAGGGGGCAGGGATGGCTATATTTCTGGGA_GATCCCTCACTTACTAGTCTGCAG          |
|      |                                               | U210_R | GGGTATATCTCCTTCTGCAGACTAGTAAGTGAGGGATC_TCCCAGAAATATAGCCATCCC          |
| U21A | <b>A</b> GAUCCCUACACUU ACUAGUCUGCAG AAGGAGAU  | U21A_F | GACGTGAGGGGGCAGGGATGGCTATATTTCTGGGA <b>A</b> GATCCCTCACTTACTAGTCTGCAG |
|      |                                               | U21A_R | GGGTATATCTCCTTCTGCAGACTAGTAAGTGAGGGATC <b>I</b> TCCCAGAAATATAGCCATCCC |
| U21C | <b>C</b> GAUCCCUACACUU ACUAGUCUGCAG AAGGAGAU  | U21C_F | GACGTGAGGGGGCAGGGATGGCTATATTTCTGGGA <b>C</b> GATCCCTCACTTACTAGTCTGCAG |
|      |                                               | U21C_R | GGGTATATCTCCTTCTGCAGACTAGTAAGTGAGGGATC <b>G</b> TCCCAGAAATATAGCCATCCC |
| U21U | <b>U</b> GAUCCCUACACUU ACUAGUCUGCAG AAGGAGAU  | U21U_F | GACGTGAGGGGGCAGGGATGGCTATATTTCTGGGA <b>I</b> GATCCCTCACTTACTAGTCTGCAG |
|      |                                               | U21U_R | GGGTATATCTCCTTCTGCAGACTAGTAAGTGAGGGATC <b>A</b> TCCCAGAAATATAGCCATCCC |
| U220 | <u>G_AUCCCUACACUU ACUAGUCUGCAG AAGGAGAU</u>   | U220_F | GACGTGAGGGGGCAGGGATGGCTATATTTCTGGGAG_ATCCCTCACTTACTAGTCTGCAG          |
|      |                                               | U220_R | GGGTATATCTCCTTCTGCAGACTAGTAAGTGAGGGAT_CTCCCAGAAATATAGCCATCC           |
| U22A | <b>A</b> G_AUCCCUACACUU ACUAGUCUGCAG AAGGAGAU | U22A_F | GACGTGAGGGGGCAGGGATGGCTATATTTCTGGGAG <b>A</b> ATCCCTCACTTACTAGTCTGCAG |
|      |                                               | U22A_R | GGGTATATCTCCTTCTGCAGACTAGTAAGTGAGGGAT <b>I</b> CTCCCAGAAATATAGCCATCC  |
| U22C | <b>C</b> G_AUCCCUACACUU ACUAGUCUGCAG AAGGAGAU | U22C_F | GACGTGAGGGGGCAGGGATGGCTATATTTCTGGGAG <b>C</b> ATCCCTCACTTACTAGTCTGCAG |
|      |                                               | U22C_R | GGGTATATCTCCTTCTGCAGACTAGTAAGTGAGGGAT <b>G</b> CTCCCAGAAATATAGCCATCC  |
| U22U | <b>U</b> G_AUCCCUACACUU ACUAGUCUGCAG AAGGAGAU | U22U_F | GACGTGAGGGGGCAGGGATGGCTATATTTCTGGGAG <b>I</b> ATCCCTCACTTACTAGTCTGCAG |
|      |                                               | U22U_R | GGGTATATCTCCTTCTGCAGACTAGTAAGTGAGGGAT <b>A</b> CTCCCAGAAATATAGCCATCC  |
| U230 | <u>GG_UCCCUACACUU ACUAGUCUGCAG AAGGAGAU</u>   | U230_F | GACGTGAGGGGGCAGGGATGGCTATATTTCTGGGAGG_TCCCTCACTTACTAGTCTGCAG          |
|      |                                               | U230_R | GGGTATATCTCCTTCTGCAGACTAGTAAGTGAGGGG_CCTCCCAGAAATATAGCCATCC           |
| U23C | <b>C</b> GG_UCCCUACACUUACUAGUCUGCAGAAGGAGAU   | U23C_F | GACGTGAGGGGGCAGGGATGGCTATATTTCTGGGAGG <b>C</b> TCCCTCACTTACTAGTCTGCAG |
|      |                                               | U23C_R | GGGTATATCTCCTTCTGCAGACTAGTAAGTGAGGGG <b>G</b> CCTCCCAGAAATATAGCCATCC  |
| U23G | <b>G</b> GG_UCCCUACACUUACUAGUCUGCAGAAGGAGAU   | U23G_F | GACGTGAGGGGGCAGGGATGGCTATATTTCTGGGAGG <b>G</b> TCCCTCACTTACTAGTCTGCAG |
|      |                                               | U23G_R | GGGTATATCTCCTTCTGCAGACTAGTAAGTGAGGGG <b>C</b> CCTCCCAGAAATATAGCCATCC  |
| U23U | <b>U</b> GG_UCCCUACACUUACUAGUCUGCAGAAGGAGAU   | U23U_F | GACGTGAGGGGGCAGGGATGGCTATATTTCTGGGAGG <b>I</b> TCCCTCACTTACTAGTCTGCAG |
|      |                                               | U23U_R | GGGTATATCTCCTTCTGCAGACTAGTAAGTGAGGGG <b>A</b> CCTCCCAGAAATATAGCCATCC  |
| U240 | <u>GGA_CCCUACACUU ACUAGUCUGCAG AAGGAGAU</u>   | U240_F | GACGTGAGGGGGCAGGGATGGCTATATTTCTGGGAGGA_CCCTCACTTACTAGTCTGCAG          |
|      |                                               | U240_R | GGGTATATCTCCTTCTGCAGACTAGTAAGTGAGGG_TCCCTCCCAGAAATATAGCCATCC          |
| U24A | <b>A</b> GGA_CCCUACACUUACUAGUCUGCAGAAGGAGAU   | U24A_F | GACGTGAGGGGGCAGGGATGGCTATATTTCTGGGAGGA <b>A</b> CCCTCACTTACTAGTCTGCAG |
|      |                                               | U24A_R | GGGTATATCTCCTTCTGCAGACTAGTAAGTGAGGG <b>I</b> TCCCTCCCAGAAATATAGCCATCC |
| U24C | <b>C</b> GGA_CCCUACACUUACUAGUCUGCAGAAGGAGAU   | U24C_F | GACGTGAGGGGGCAGGGATGGCTATATTTCTGGGAGGA <b>C</b> CCCTCACTTACTAGTCTGCAG |
|      |                                               | U24C_R | GGGTATATCTCCTTCTGCAGACTAGTAAGTGAGGG <b>G</b> TCCCTCCCAGAAATATAGCCATCC |
| U24G | <b>G</b> GGA_CCCUACACUUACUAGUCUGCAGAAGGAGAU   | U24G_F | GACGTGAGGGGGCAGGGATGGCTATATTTCTGGGAGGA <b>G</b> CCCTCACTTACTAGTCTGCAG |
|      |                                               | U24G_R | GGGTATATCTCCTTCTGCAGACTAGTAAGTGAGGG <b>C</b> TCCCTCCCAGAAATATAGCCATCC |
| U270 | <u>GGAUCC_UCACUU ACUAGUCUGCAG AAGGAGAU</u>    | U270_F | GGGGGCAGGGATGGCTATATTTCTGGGAGGATCC_TCACTTACTAGTCTGCAGAAGGAG           |
|      |                                               | U270_R | CCATGGGTATATCTCCTTCTGCAGACTAGTAAGTGA_GGATCCTCCCAGAAATATAGCC           |
| U27A | <b>A</b> GGAUCC_UCACUUACUAGUCUGCAGAAGGAGAU    | U27A_F | GGGGGCAGGGATGGCTATATTTCTGGGAGGATCC <b>A</b> TCACTTACTAGTCTGCAGAAGGAG  |
|      |                                               | U27A_R | CCATGGGTATATCTCCTTCTGCAGACTAGTAAGTGA <b>I</b> GGATCCTCCCAGAAATATAGCC  |

|    |       |                                                             |         |                                                                       |
|----|-------|-------------------------------------------------------------|---------|-----------------------------------------------------------------------|
| 45 | U27G  | GGAUCC <b>G</b> UCACUUACUAGUCUGCAGAAGGAGAU                  | U27G_F  | GGGGGCAGGGATGGCTATATTTCTGGGAGGATCC <b>G</b> TCACTTACTAGTCTGCAGAAGGAG  |
| 46 |       |                                                             | U27G_R  | CCATGGGTATATCTCCTTCTGCAGACTAGTAAGTGA <b>C</b> GGATCCTCCCAGAAATATAGCC  |
| 47 | U27U  | GGAUCC <b>U</b> UCACUUACUAGUCUGCAGAAGGAGAU                  | U27U_F  | GGGGGCAGGGATGGCTATATTTCTGGGAGGATCC <b>I</b> TCACTTACTAGTCTGCAGAAGGAG  |
| 48 |       |                                                             | U27U_R  | CCATGGGTATATCTCCTTCTGCAGACTAGTAAGTGA <b>A</b> GGATCCTCCCAGAAATATAGCC  |
| 49 |       |                                                             |         |                                                                       |
| 50 | U280  | GGAUCCC_CACU <b>U</b> <i>ACUAGUCUGCAG</i> <b>A</b> AGGAGAU  | U280_F  | GGGGGCAGGGATGGCTATATTTCTGGGAGGATCCC_CACTTACTAGTCTGCAGAAGGAGA          |
| 51 |       |                                                             | U280_R  | CTCCATGGGTATATCTCCTTCTGCAGACTAGTAAGTGGGGATCCTCCCAGAAATATAGC           |
| 52 | U28A  | GGAUCCC <b>A</b> CACUACUAGUCUGCAGAAGGAGAU                   | U28A_F  | GGGGGCAGGGATGGCTATATTTCTGGGAGGATCCC <b>A</b> CACTTACTAGTCTGCAGAAGGAGA |
| 53 |       |                                                             | U28A_R  | CTCCATGGGTATATCTCCTTCTGCAGACTAGTAAGTGGGGATCCTCCCAGAAATATAGC           |
| 54 | U28C  | GGAUCCC <b>C</b> CACUACUAGUCUGCAGAAGGAGAU                   | U28C_F  | GGGGGCAGGGATGGCTATATTTCTGGGAGGATCCC <b>C</b> CACTTACTAGTCTGCAGAAGGAGA |
| 55 |       |                                                             | U28C_R  | CTCCATGGGTATATCTCCTTCTGCAGACTAGTAAGTGGGGATCCTCCCAGAAATATAGC           |
| 56 | U28G  | GGAUCCC <b>G</b> CACUACUAGUCUGCAGAAGGAGAU                   | U28G_F  | GGGGGCAGGGATGGCTATATTTCTGGGAGGATCCC <b>G</b> CACTTACTAGTCTGCAGAAGGAGA |
| 57 |       |                                                             | U28G_R  | CTCCATGGGTATATCTCCTTCTGCAGACTAGTAAGTGGGGATCCTCCCAGAAATATAGC           |
| 58 |       |                                                             |         |                                                                       |
| 59 | U290  | GGAUCCCU_ACU <b>U</b> <i>ACUAGUCUGCAG</i> <b>A</b> AGGAGAU  | U290_F  | GGGGCAGGGATGGCTATATTTCTGGGAGGATCCCT_ACTTACTAGTCTGCAGAAGGAGAT          |
| 60 |       |                                                             | U290_R  | CTCCATGGGTATATCTCCTTCTGCAGACTAGTAAGT_AGGGATCCTCCCAGAAATATAGC          |
| 61 | U29A  | GGAUCCCU <b>A</b> ACUACUAGUCUGCAGAAGGAGAU                   | U29A_F  | GGGGCAGGGATGGCTATATTTCTGGGAGGATCCCT <b>A</b> ACTTACTAGTCTGCAGAAGGAGAT |
| 62 |       |                                                             | U29A_R  | CTCCATGGGTATATCTCCTTCTGCAGACTAGTAAGT_IAGGGATCCTCCCAGAAATATAGC         |
| 63 | U29G  | GGAUCCCU <b>G</b> ACUACUAGUCUGCAGAAGGAGAU                   | U29G_F  | GGGGCAGGGATGGCTATATTTCTGGGAGGATCCCT <b>G</b> ACTTACTAGTCTGCAGAAGGAGAT |
| 64 |       |                                                             | U29G_R  | CTCCATGGGTATATCTCCTTCTGCAGACTAGTAAGT_CAGGGATCCTCCCAGAAATATAGC         |
| 65 | U29U  | GGAUCCCU <b>U</b> ACUACUAGUCUGCAGAAGGAGAU                   | U29U_F  | GGGGCAGGGATGGCTATATTTCTGGGAGGATCCCT <b>I</b> ACTTACTAGTCTGCAGAAGGAGAT |
| 66 |       |                                                             | U29U_R  | CTCCATGGGTATATCTCCTTCTGCAGACTAGTAAGT_AAGGGATCCTCCCAGAAATATAGC         |
| 67 |       |                                                             |         |                                                                       |
| 68 | U2110 | GGAUCCCUCA_U <b>U</b> <i>ACUAGUCUGCAG</i> <b>A</b> AGGAGAU  | U2110_F | GATGGCTATATTTCTGGGAGGATCCCTCA_TTACTAGTCTGCAGAAGGAGATATACC             |
| 69 |       |                                                             | U2110_R | CATGGGTATATCTCCTTCTGCAGACTAGTAA_TGAGGGATCCTCCCAGAAATATAG              |
| 70 | U211A | GGAUCCCUCA <b>A</b> UUACUAGUCUGCAGAAGGAGAU                  | U211A_F | GATGGCTATATTTCTGGGAGGATCCCTCA <b>A</b> TTACTAGTCTGCAGAAGGAGATATACC    |
| 71 |       |                                                             | U211A_R | CATGGGTATATCTCCTTCTGCAGACTAGTAA_U TGAGGGATCCTCCCAGAAATATAG            |
| 72 | U211G | GGAUCCCUCA <b>G</b> UUACUAGUCUGCAGAAGGAGAU                  | U211G_F | GATGGCTATATTTCTGGGAGGATCCCTCA <b>G</b> TTACTAGTCTGCAGAAGGAGATATACC    |
| 73 |       |                                                             | U211G_R | CATGGGTATATCTCCTTCTGCAGACTAGTAA_C TGAGGGATCCTCCCAGAAATATAG            |
| 74 | U211U | GGAUCCCUCA <b>U</b> UUACUAGUCUGCAGAAGGAGAU                  | U211U_F | GATGGCTATATTTCTGGGAGGATCCCTCA <b>I</b> TTACTAGTCTGCAGAAGGAGATATACC    |
| 75 |       |                                                             | U211U_R | CATGGGTATATCTCCTTCTGCAGACTAGTAA_A TGAGGGATCCTCCCAGAAATATAG            |
| 76 |       |                                                             |         |                                                                       |
| 77 | U2120 | GGAUCCCUCAC_U <b>U</b> <i>ACUAGUCUGCAG</i> <b>A</b> AGGAGAU | U2120_F | GATGGCTATATTTCTGGGAGGATCCCTCAC_TACTAGTCTGCAGAAGGAGATATACC             |
| 78 |       |                                                             | U2120_R | CATGGGTATATCTCCTTCTGCAGACTAGTA_GTGAGGGATCCTCCCAGAAATATAG              |
| 79 | U212A | GGAUCCCUCAC <b>A</b> U <i>ACUAGUCUGCAG</i> <b>A</b> AGGAGAU | U212A_F | GATGGCTATATTTCTGGGAGGATCCCTCAC <b>A</b> TACTAGTCTGCAGAAGGAGATATACC    |
| 80 |       |                                                             | U212A_R | CATGGGTATATCTCCTTCTGCAGACTAGTA_I TGAGGGATCCTCCCAGAAATATAG             |
| 81 | U212C | GGAUCCCUCAC <b>C</b> U <i>ACUAGUCUGCAG</i> <b>A</b> AGGAGAU | U212C_F | GATGGCTATATTTCTGGGAGGATCCCTCAC <b>C</b> TACTAGTCTGCAGAAGGAGATATACC    |
| 82 |       |                                                             | U212C_R | CATGGGTATATCTCCTTCTGCAGACTAGTA_G TGAGGGATCCTCCCAGAAATATAG             |
| 83 | U212G | GGAUCCCUCAC <b>G</b> U <i>ACUAGUCUGCAG</i> <b>A</b> AGGAGAU | U212G_F | GATGGCTATATTTCTGGGAGGATCCCTCAC <b>G</b> TACTAGTCTGCAGAAGGAGATATACC    |
| 84 |       |                                                             | U212G_R | CATGGGTATATCTCCTTCTGCAGACTAGTA_C TGAGGGATCCTCCCAGAAATATAG             |
| 85 |       |                                                             |         |                                                                       |
| 86 | U2130 | GGAUCCCUCACU_ <i>ACUAGUCUGCAG</i> <b>A</b> AGGAGAU          | U2130_F | GATGGCTATATTTCTGGGAGGATCCCTCACT_ACTAGTCTGCAGAAGGAGATATACC             |
| 87 |       |                                                             | U2130_R | GTGAAAAGCTCCATGGGTATATCTCCTTCTGCAGACTAGT_AGTGAGGGATCCTCCCAG           |



|    |       |                                                           |         |                                                                       |
|----|-------|-----------------------------------------------------------|---------|-----------------------------------------------------------------------|
| 86 | U2130 | GGAUCCCUCACU_ <i>ACUAGUCUGCAG</i> <b>A</b> AGGAGAU        | U2130_F | GATGGCTATATTTCTGGGAGGATCCCTCACT_ ACTAGTCTGCAGAAGGAGATATACC            |
| 87 |       |                                                           | U2130_R | GTGAAAAGCTCCATGGGTATATCTCCTTCTGCAGACTAGT_ AGTGAGGGATCCTCCCAG          |
| 88 | U213A | GGAUCCCUCACU <b>A</b> ACUAGUCUGCAGAAGGAGAU                | U213A_F | GATGGCTATATTTCTGGGAGGATCCCTCACT <b>A</b> ACTAGTCTGCAGAAGGAGATATACC    |
| 89 |       |                                                           | U213A_R | GTGAAAAGCTCCATGGGTATATCTCCTTCTGCAGACTAGT <b>I</b> AGTGAGGGATCCTCCCAG  |
| 90 | U213C | GGAUCCCUCACU <b>C</b> ACUAGUCUGCAGAAGGAGAU                | U213C_F | GATGGCTATATTTCTGGGAGGATCCCTCACT <b>C</b> ACTAGTCTGCAGAAGGAGATATACC    |
| 91 |       |                                                           | U213C_R | GTGAAAAGCTCCATGGGTATATCTCCTTCTGCAGACTAGT <b>G</b> AGTGAGGGATCCTCCCAG  |
| 92 | U213G | GGAUCCCUCACU <b>G</b> ACUAGUCUGCAGAAGGAGAU                | U213G_F | GATGGCTATATTTCTGGGAGGATCCCTCACT <b>G</b> ACTAGTCTGCAGAAGGAGATATACC    |
| 93 |       |                                                           | U213G_R | GTGAAAAGCTCCATGGGTATATCTCCTTCTGCAGACTAGT <b>C</b> AGTGAGGGATCCTCCCAG  |
| 94 |       |                                                           |         |                                                                       |
| 95 | U2150 | GGAUCCCUCACUU <i>A</i> <i>UAGUCUGCAG</i> <b>A</b> AGGAGAU | U2150_F | GGGATGGCTATATTTCTGGGAGGATCCCTCACTTA_ TAGTCTGCAGAAGGAGATATACCC         |
| 96 |       |                                                           | U2150_R | GTGAAAAGCTCCATGGGTATATCTCCTTCTGCAGACTA_ TAAGTGAGGGATCCTCCCAG          |
| 97 | U215A | GGAUCCCUCACUU <b>A</b> UAGUCUGCAGAAGGAGAU                 | U215A_F | GGGATGGCTATATTTCTGGGAGGATCCCTCACTTA <b>A</b> TAGTCTGCAGAAGGAGATATACCC |
| 98 |       |                                                           | U215A_R | GTGAAAAGCTCCATGGGTATATCTCCTTCTGCAGACTA <b>I</b> TAAGTGAGGGATCCTCCCAG  |
| 99 | U215G | GGAUCCCUCACUU <b>G</b> UAGUCUGCAGAAGGAGAU                 | U215G_F | GGGATGGCTATATTTCTGGGAGGATCCCTCACTTA <b>G</b> TAGTCTGCAGAAGGAGATATACCC |
| 00 |       |                                                           | U215G_R | GTGAAAAGCTCCATGGGTATATCTCCTTCTGCAGACTA <b>C</b> TAAGTGAGGGATCCTCCCAG  |
| 01 | U215U | GGAUCCCUCACUU <b>U</b> UAGUCUGCAGAAGGAGAU                 | U215U_F | GGGATGGCTATATTTCTGGGAGGATCCCTCACTTA <b>I</b> TAGTCTGCAGAAGGAGATATACCC |
| 02 |       |                                                           | U215U_R | GTGAAAAGCTCCATGGGTATATCTCCTTCTGCAGACTA <b>A</b> TAAGTGAGGGATCCTCCCAG  |
| 03 |       |                                                           |         |                                                                       |
| 04 | U2160 | GGAUCCCUCACUU <i>AC</i> <i>AGUCUGCAG</i> <b>A</b> AGGAGAU | U2160_F | GGGATGCCTATATTTCTGGGAGGATCCCTCACTTAC_ AGTCTGCAGAAGGAGATATACCC         |
| 05 |       |                                                           | U2160_R | CAGTGAAAAGCTCCATGGGTATATCTCCTTCTGCAGACT_ GTAAGTGAGGGATCCTCCC          |
| 06 | U216A | GGAUCCCUCACUU <b>A</b> CAGUCUGCAGAAGGAGAU                 | U216A_F | GGGATGCCTATATTTCTGGGAGGATCCCTCACTTAC <b>A</b> AGTCTGCAGAAGGAGATATACCC |
| 07 |       |                                                           | U216A_R | CAGTGAAAAGCTCCATGGGTATATCTCCTTCTGCAGACT <b>I</b> GTAAGTGAGGGATCCTCCC  |
| 08 | U216C | GGAUCCCUCACUU <b>C</b> AGUCUGCAGAAGGAGAU                  | U216C_F | GGGATGCCTATATTTCTGGGAGGATCCCTCACTTAC <b>C</b> AGTCTGCAGAAGGAGATATACCC |
| 09 |       |                                                           | U216C_R | CAGTGAAAAGCTCCATGGGTATATCTCCTTCTGCAGACT <b>G</b> GTAAGTGAGGGATCCTCCC  |
| 10 | U216G | GGAUCCCUCACUU <b>G</b> AGUCUGCAGAAGGAGAU                  | U216G_F | GGGATGCCTATATTTCTGGGAGGATCCCTCACTTAC <b>G</b> AGTCTGCAGAAGGAGATATACCC |
| 11 |       |                                                           | U216G_R | CAGTGAAAAGCTCCATGGGTATATCTCCTTCTGCAGACT <b>C</b> GTAAGTGAGGGATCCTCCC  |
| 12 |       |                                                           |         |                                                                       |
| 13 | U2240 | GGAUCCCUCACUUACUAGUCUGC_ <b>G</b> AAGGAGAU                | U2240_F | CTATATTTCTGGGAGGATCCCTCACTTACTAGTCTGC_ GAAGGAGATATACCCATGGAGC         |
| 14 |       |                                                           | U2240_R | CGCCAGTGAAAAGCTCCATGGGTATATCTCCTT_ GCAGACTAGTAAGTGAGGGATC             |
| 15 | U224C | GGAUCCCUCACUUACUAGUCUGC <b>C</b> GAAGGAGAU                | U224C_F | CTATATTTCTGGGAGGATCCCTCACTTACTAGTCTGC <b>C</b> GAAGGAGATATACCCATGGAGC |
| 16 |       |                                                           | U224C_R | CGCCAGTGAAAAGCTCCATGGGTATATCTCCTT <b>C</b> GCAGACTAGTAAGTGAGGGATC     |
| 17 | U224G | GGAUCCCUCACUUACUAGUCUGC <b>G</b> GAAGGAGAU                | U224G_F | CTATATTTCTGGGAGGATCCCTCACTTACTAGTCTGC <b>G</b> GAAGGAGATATACCCATGGAGC |
| 18 |       |                                                           | U224G_R | CGCCAGTGAAAAGCTCCATGGGTATATCTCCTT <b>C</b> GCAGACTAGTAAGTGAGGGATC     |
| 19 | U224U | GGAUCCCUCACUUACUAGUCUGC <b>U</b> GAAGGAGAU                | U224U_F | CTATATTTCTGGGAGGATCCCTCACTTACTAGTCTGC <b>I</b> GAAGGAGATATACCCATGGAGC |
| 20 |       |                                                           | U224U_R | CGCCAGTGAAAAGCTCCATGGGTATATCTCCTT <b>C</b> GCAGACTAGTAAGTGAGGGATC     |
| 21 |       |                                                           |         |                                                                       |
| 22 | U2250 | GGAUCCCUCACUUACUAGUCUGCA_ <b>A</b> AGGA GAU               | U2250_F | TATATTTCTGGGAGGATCCCTCACTTACTAGTCTGCA_ AAGGAGATATACCCATGGAGCT         |
| 23 |       |                                                           | U2250_R | CAACGCCAGTGAAAAGCTCCATGGGTATATCTCCTT_ TGCAGACTAGTAAGTGAGGGATC         |
| 24 | U225A | GGAUCCCUCACUUACUAGUCUGCA <b>A</b> AAGGA GAU               | U225A_F | TATATTTCTGGGAGGATCCCTCACTTACTAGTCTGCA <b>A</b> AAGGAGATATACCCATGGAGCT |
| 25 |       |                                                           | U225A_R | CAACGCCAGTGAAAAGCTCCATGGGTATATCTCCTT <b>I</b> TGCAGACTAGTAAGTGAGGGATC |
| 26 | U225C | GGAUCCCUCACUUACUAGUCUGCA <b>C</b> AAGGA GAU               | U225C_F | TATATTTCTGGGAGGATCCCTCACTTACTAGTCTGCA <b>C</b> AAGGAGATATACCCATGGAGCT |
| 27 |       |                                                           | U225C_R | CAACGCCAGTGAAAAGCTCCATGGGTATATCTCCTT <b>G</b> TGCAGACTAGTAAGTGAGGGATC |
| 28 | U225U | GGAUCCCUCACUUACUAGUCUGCA <b>U</b> AAGGA GAU               | U225U_F | TATATTTCTGGGAGGATCCCTCACTTACTAGTCTGCA <b>U</b> AAGGAGATATACCCATGGAGCT |
| 29 |       |                                                           | U225U_R | CAACGCCAGTGAAAAGCTCCATGGGTATATCTCCTT <b>A</b> TGCAGACTAGTAAGTGAGGGATC |



|     |       |                                        |         |                                                                |
|-----|-------|----------------------------------------|---------|----------------------------------------------------------------|
| 122 | U2250 | GGAUCCCUCA CUUACUAGUC UGCA_AAGGA GAU   | U2250_F | TATATTTCTGGGAGGATCCCTCACTTACTAGTCTGCA_AAGGAGATATACCCATGGAGCT   |
| 123 |       |                                        | U2250_R | CAACGCCAGTGAAAAGCTCCATGGGTATATCTCCTT_TGCAGACTAGTAAGTGAGGGATC   |
| 124 | U225A | GGAUCCCUCA CUUACUAGUC UGCA_AAGGA GAU   | U225A_F | TATATTTCTGGGAGGATCCCTCACTTACTAGTCTGCA_AAGGAGATATACCCATGGAGCT   |
| 125 |       |                                        | U225A_R | CAACGCCAGTGAAAAGCTCCATGGGTATATCTCCTT_I TGCAGACTAGTAAGTGAGGGATC |
| 126 | U225C | GGAUCCCUCA CUUACUAGUC UGCA_C AAGGA GAU | U225C_F | TATATTTCTGGGAGGATCCCTCACTTACTAGTCTGCA_C AAGGAGATATACCCATGGAGCT |
| 127 |       |                                        | U225C_R | CAACGCCAGTGAAAAGCTCCATGGGTATATCTCCTT_G TGCAGACTAGTAAGTGAGGGATC |
| 128 | U225U | GGAUCCCUCA CUUACUAGUC UGCA_U AAGGA GAU | U225U_F | TATATTTCTGGGAGGATCCCTCACTTACTAGTCTGCA_U AAGGAGATATACCCATGGAGCT |
| 129 |       |                                        | U225U_R | CAACGCCAGTGAAAAGCTCCATGGGTATATCTCCTT_A TGCAGACTAGTAAGTGAGGGATC |
| 130 |       |                                        |         |                                                                |
| 131 | U2340 | GGAUCCCUCA CUUACUAGUC UGCAGAAGGA GAL   | U2340_F | GAGGATCCCTCACTTACTAGTCTGCAGAAGGAGAT_TACCCATGGAGCTTTTCACTG      |
| 132 |       |                                        | U2340_R | GGGAACAACGCCAGTGAAAAGCTCCATGGGTATATCTCCTTCTGCAGACTAGTAAGTG     |
| 133 | U234C | GGAUCCCUCA CUUACUAGUC UGCAGAAGGA GAL   | U234C_F | GAGGATCCCTCACTTACTAGTCTGCAGAAGGAGAT_C TACCCATGGAGCTTTTCACTG    |
| 134 |       |                                        | U234C_R | GGGAACAACGCCAGTGAAAAGCTCCATGGGTAG_ATCTCCTTCTGCAGACTAGTAAGTG    |
| 135 | U234G | GGAUCCCUCA CUUACUAGUC UGCAGAAGGA GAL   | U234G_F | GAGGATCCCTCACTTACTAGTCTGCAGAAGGAGAT_G TACCCATGGAGCTTTTCACTG    |
| 136 |       |                                        | U234G_R | GGGAACAACGCCAGTGAAAAGCTCCATGGGTAC_ATCTCCTTCTGCAGACTAGTAAGTG    |
| 137 | U234U | GGAUCCCUCA CUUACUAGUC UGCAGAAGGA GAL   | U234U_F | GAGGATCCCTCACTTACTAGTCTGCAGAAGGAGAT_U TACCCATGGAGCTTTTCACTG    |
| 138 |       |                                        | U234U_R | GGGAACAACGCCAGTGAAAAGCTCCATGGGTAA_ATCTCCTTCTGCAGACTAGTAAGTG    |
| 139 |       |                                        |         |                                                                |
| 140 | U2350 | GGAUCCCUCA CUUACUAGUC UGCAGAAGGA GAL   | U2350_F | GATCCCTCACTTACTAGTCTGCAGAAGGAGATA_ACCCATGGAGCTTTTCACTG         |
| 141 |       |                                        | U2350_R | GGGAACAACGCCAGTGAAAAGCTCCATGGGT_TATCTCCTTCTGCAGACTAGTAAGTG     |
| 142 | U235A | GGAUCCCUCA CUUACUAGUC UGCAGAAGGA GAL   | U235A_F | GATCCCTCACTTACTAGTCTGCAGAAGGAGATA_A ACCCATGGAGCTTTTCACTG       |
| 143 |       |                                        | U235A_R | GGGAACAACGCCAGTGAAAAGCTCCATGGGT_I TATCTCCTTCTGCAGACTAGTAAGTG   |
| 144 | U235C | GGAUCCCUCA CUUACUAGUC UGCAGAAGGA GAL   | U235C_F | GATCCCTCACTTACTAGTCTGCAGAAGGAGATA_C ACCCATGGAGCTTTTCACTG       |
| 145 |       |                                        | U235C_R | GGGAACAACGCCAGTGAAAAGCTCCATGGGT_G TATCTCCTTCTGCAGACTAGTAAGTG   |
| 146 | U235G | GGAUCCCUCA CUUACUAGUC UGCAGAAGGA GAL   | U235G_F | GATCCCTCACTTACTAGTCTGCAGAAGGAGATA_G ACCCATGGAGCTTTTCACTG       |
| 147 |       |                                        | U235G_R | GGGAACAACGCCAGTGAAAAGCTCCATGGGT_C TATCTCCTTCTGCAGACTAGTAAGTG   |
| 148 |       |                                        |         |                                                                |
| 149 | U2370 | GGAUCCCUCA CUUACUAGUC UGCAGAAGGA GAL   | U2370_F | GATCCCTCACTTACTAGTCTGCAGAAGGAGATATA_CCATGGAGCTTTTCACTGGC       |
| 150 |       |                                        | U2370_R | GGGAACAACGCCAGTGAAAAGCTCCATGG_TATATCTCCTTCTGCAGACTAGTAAGTG     |
| 151 | U237A | GGAUCCCUCA CUUACUAGUC UGCAGAAGGA GAL   | U237A_F | GATCCCTCACTTACTAGTCTGCAGAAGGAGATATA_A CCATGGAGCTTTTCACTGGC     |
| 152 |       |                                        | U237A_R | GGGAACAACGCCAGTGAAAAGCTCCATGG_I TATATCTCCTTCTGCAGACTAGTAAGTG   |
| 153 | U237G | GGAUCCCUCA CUUACUAGUC UGCAGAAGGA GAL   | U237G_F | GATCCCTCACTTACTAGTCTGCAGAAGGAGATATA_G CCATGGAGCTTTTCACTGGC     |
| 154 |       |                                        | U237G_R | GGGAACAACGCCAGTGAAAAGCTCCATGG_C TATATCTCCTTCTGCAGACTAGTAAGTG   |
| 155 | U237U | GGAUCCCUCA CUUACUAGUC UGCAGAAGGA GAL   | U237U_F | GATCCCTCACTTACTAGTCTGCAGAAGGAGATATA_I CCATGGAGCTTTTCACTGGC     |
| 156 |       |                                        | U237U_R | GGGAACAACGCCAGTGAAAAGCTCCATGG_A TATATCTCCTTCTGCAGACTAGTAAGTG   |
| 157 |       |                                        |         |                                                                |
| 158 | U2380 | GGAUCCCUCA CUUACUAGUC UGCAGAAGGA GAL   | U2380_F | GATCCCTCACTTACTAGTCTGCAGAAGGAGATATA_CATGGAGCTTTTCACTGGCG       |
| 159 |       |                                        | U2380_R | ATGGGAACAACGCCAGTGAAAAGCTCCATG_GTATATCTCCTTCTGCAGACTAGTAAG     |
| 160 | U238A | GGAUCCCUCA CUUACUAGUC UGCAGAAGGA GAL   | U238A_F | GATCCCTCACTTACTAGTCTGCAGAAGGAGATATA_CATGGAGCTTTTCACTGGCG       |
| 161 |       |                                        | U238A_R | ATGGGAACAACGCCAGTGAAAAGCTCCATG_I GTATATCTCCTTCTGCAGACTAGTAAG   |
| 162 | U238G | GGAUCCCUCA CUUACUAGUC UGCAGAAGGA GAL   | U238C_F | GATCCCTCACTTACTAGTCTGCAGAAGGAGATATA_GCATGGAGCTTTTCACTGGCG      |
| 163 |       |                                        | U238C_R | ATGGGAACAACGCCAGTGAAAAGCTCCATG_CGTATATCTCCTTCTGCAGACTAGTAAG    |
| 164 | U238U | GGAUCCCUCA CUUACUAGUC UGCAGAAGGA GAL   | U238G_F | GATCCCTCACTTACTAGTCTGCAGAAGGAGATATA_I CATGGAGCTTTTCACTGGCG     |
| 165 |       |                                        | U238G_R | ATGGGAACAACGCCAGTGAAAAGCTCCATG_AGTATATCTCCTTCTGCAGACTAGTAAG    |

|     |            |                                    |         |                                                               |
|-----|------------|------------------------------------|---------|---------------------------------------------------------------|
| 167 | U2100 (U9) | GGAUCCUC_CUU ACUAGUCUGCAG AAGGAGAU | U2100_F | CAGGGATGGI TATATTTCTGGGAGGATCCCTC_CTTACTAGTCTGCAGAAGGAGATATAC |
| 168 |            |                                    | U2100_R | CTCCATGGGTATATCTCCTTCTGCAGACTAGTAAG_GAGGGATCCTCCCAGAAATATAGC  |
| 169 | U210C      | GGAUCCUC_CUU ACUAGUCUGCAG AAGGAGAU | U210C_F | CAGGGATGGCTATATTTCTGGGAGGATCCCTC_CTTACTAGTCTGCAGAAGGAGATATAC  |
| 170 |            |                                    | U210C_R | CTCCATGGGTATATCTCCTTCTGCAGACTAGTAAG_GAGGGATCCTCCCAGAAATATAGC  |
| 171 | U210G      | GGAUCCUC_GUU ACUAGUCUGCAG AAGGAGAU | U210G_F | CAGGGATGGCTATATTTCTGGGAGGATCCCTC_GTTACTAGTCTGCAGAAGGAGATATAC  |
| 172 |            |                                    | U210G_R | CTCCATGGGTATATCTCCTTCTGCAGACTAGTAAG_GAGGGATCCTCCCAGAAATATAGC  |
| 173 | U210U      | GGAUCCUC_UUU ACUAGUCUGCAG AAGGAGAU | U210U_F | CAGGGATGGCTATATTTCTGGGAGGATCCCTC_ICTTACTAGTCTGCAGAAGGAGATATAC |
| 174 |            |                                    | U210U_R | CTCCATGGGTATATCTCCTTCTGCAGACTAGTAAG_AGAGGGATCCTCCCAGAAATATAGC |

# Supplementary Information C. Gel

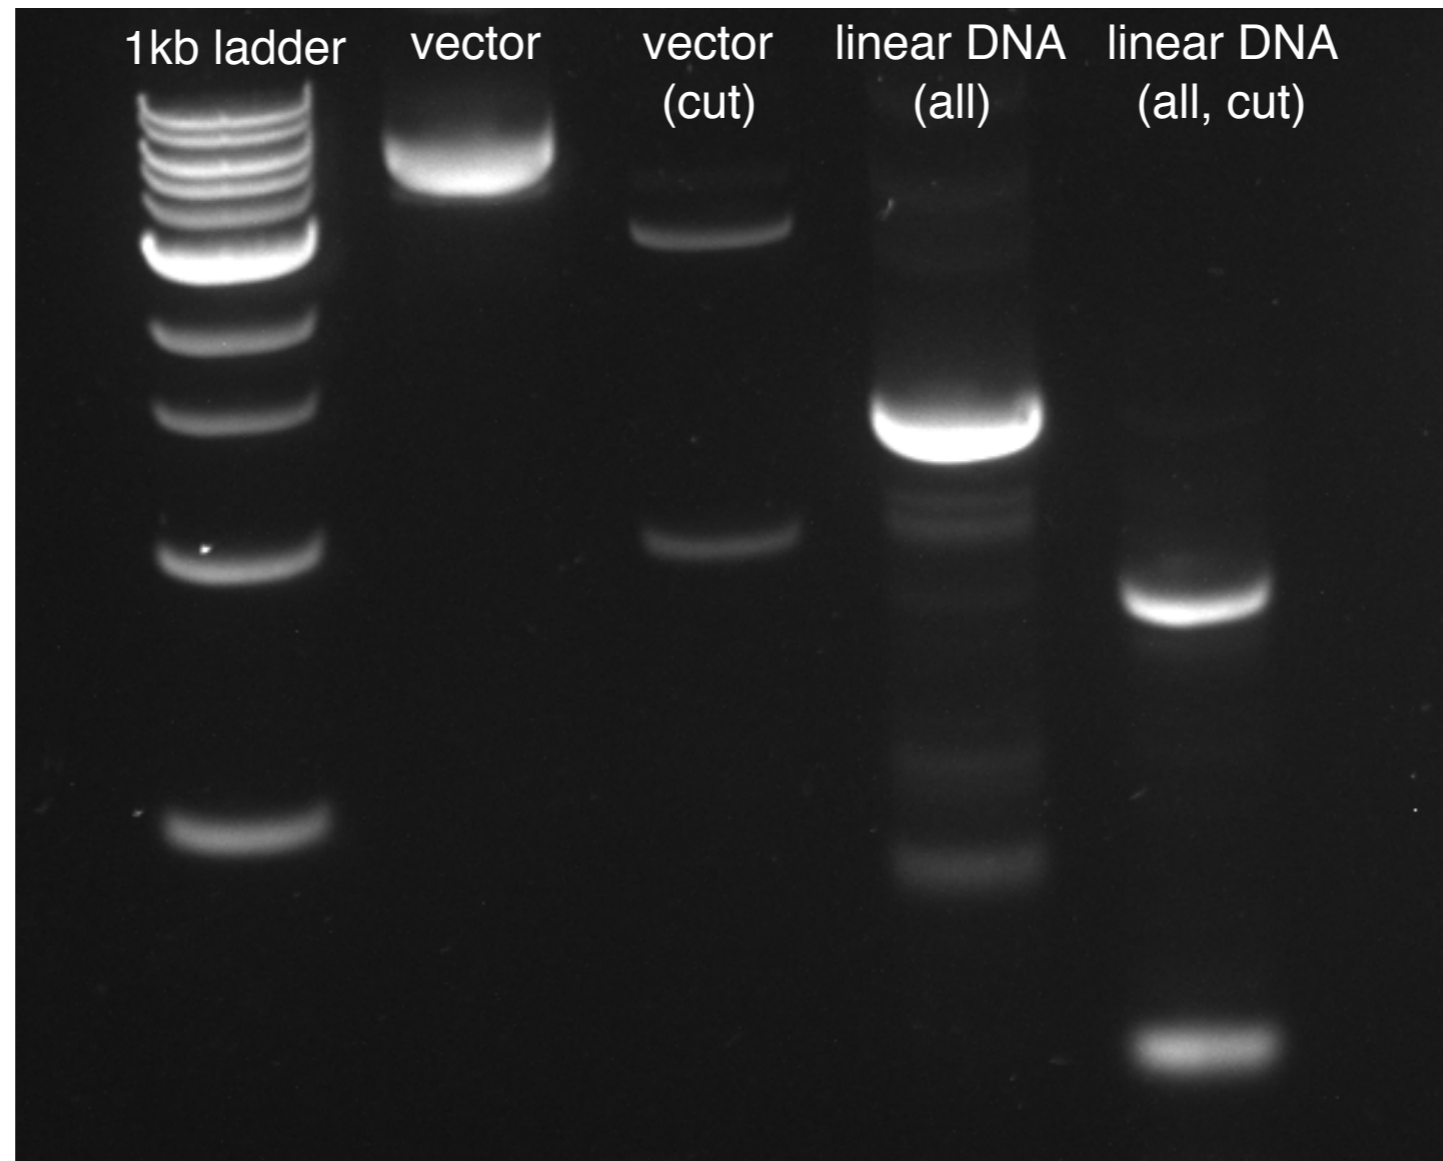

Mixture of all linear DNA from the library has very strong band at expected size (column 4).
